# Supplementary material
Source: PubMed Central journal article supplement (PMC4959079)
Supplement: AEM.00376-16_zam999117146so1.pdf [file AEM.00376-16_zam999117146so1.pdf]

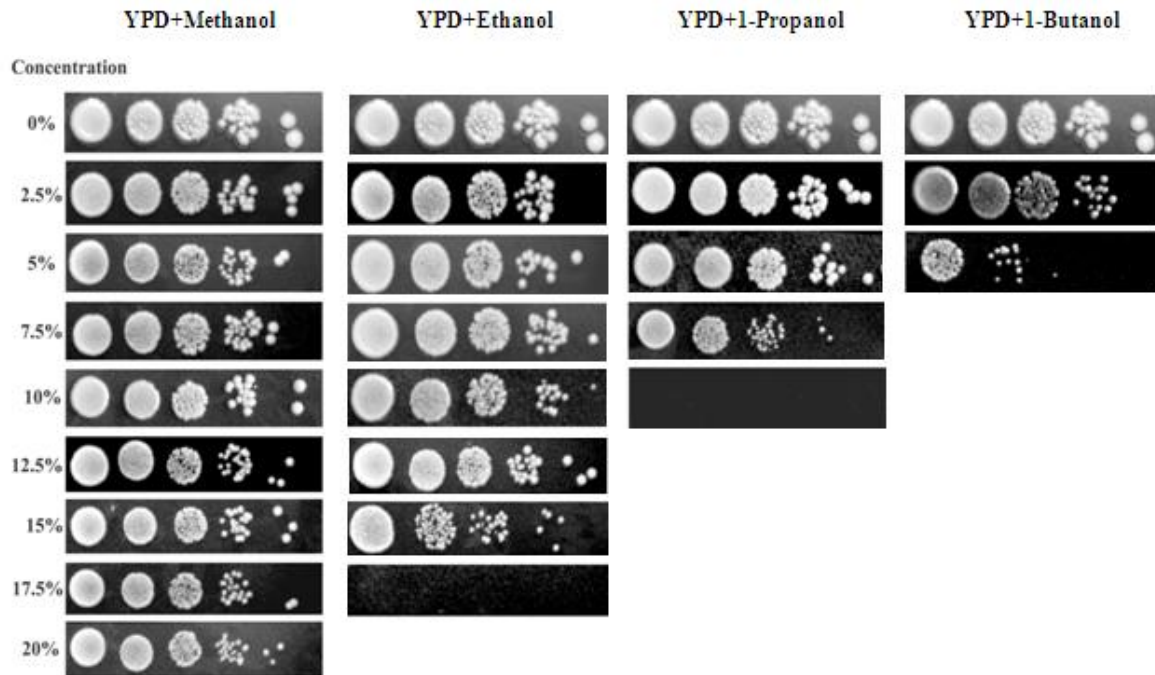

**FIG S1 The toxicity of straight-chain alcohols is correlated with their lipophilicity.** Aliquots (3  $\mu$ l) of 10-fold serial dilutions of the BY4742 strain were spotted onto freshly prepared YPD plates containing the indicated concentrations of methanol, ethanol, 1-propanol, and 1-butanol, and incubated at 30 °C for 3 days.

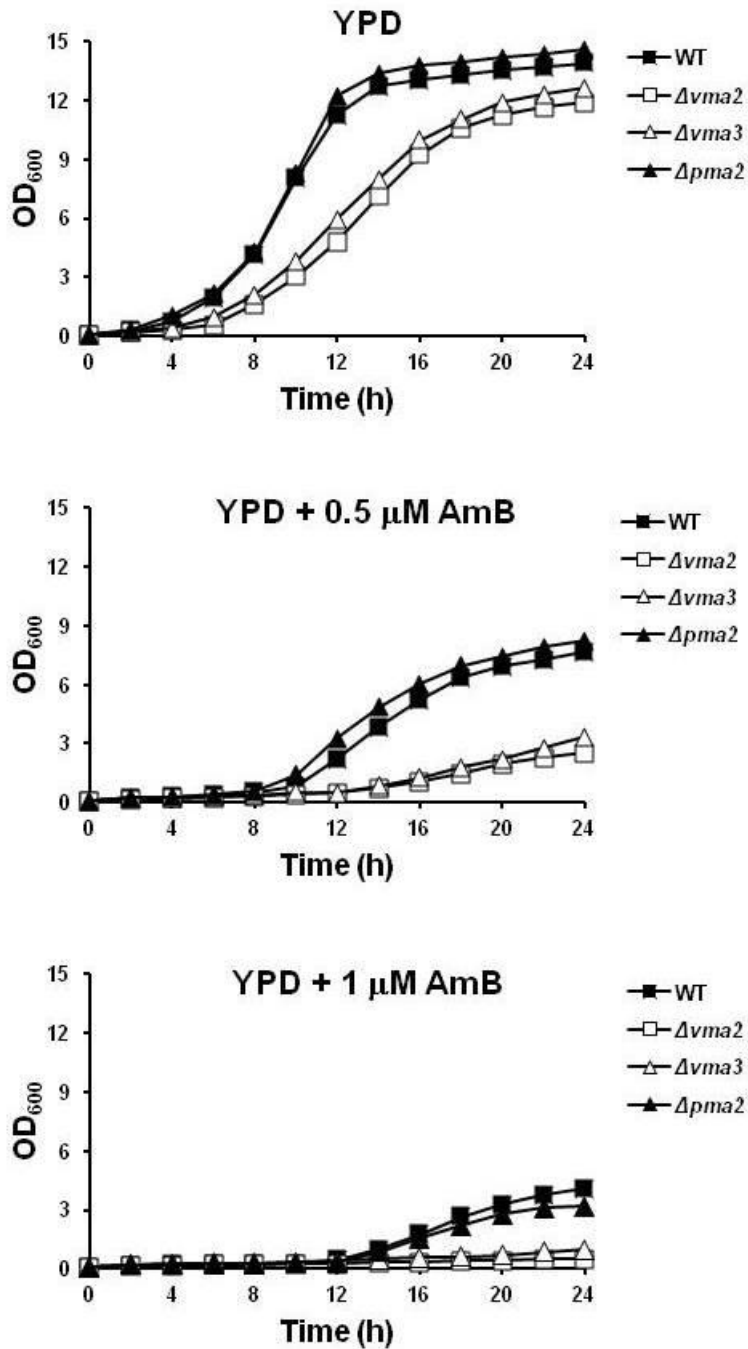

**FIG S2 V-ATPase is important for tolerance to AmB.** The wild-type,  $\Delta vma2$ ,  $\Delta vma3$ , and  $\Delta pma2$  cells grown to log phase in YPD broth were inoculated into YPD media containing 0, 0.5, and 1  $\mu$ M AmB, and incubated with shaking at 30  $^{\circ}$ C for 24 h. Growth was examined by monitoring  $OD_{600}$  at the indicated times.

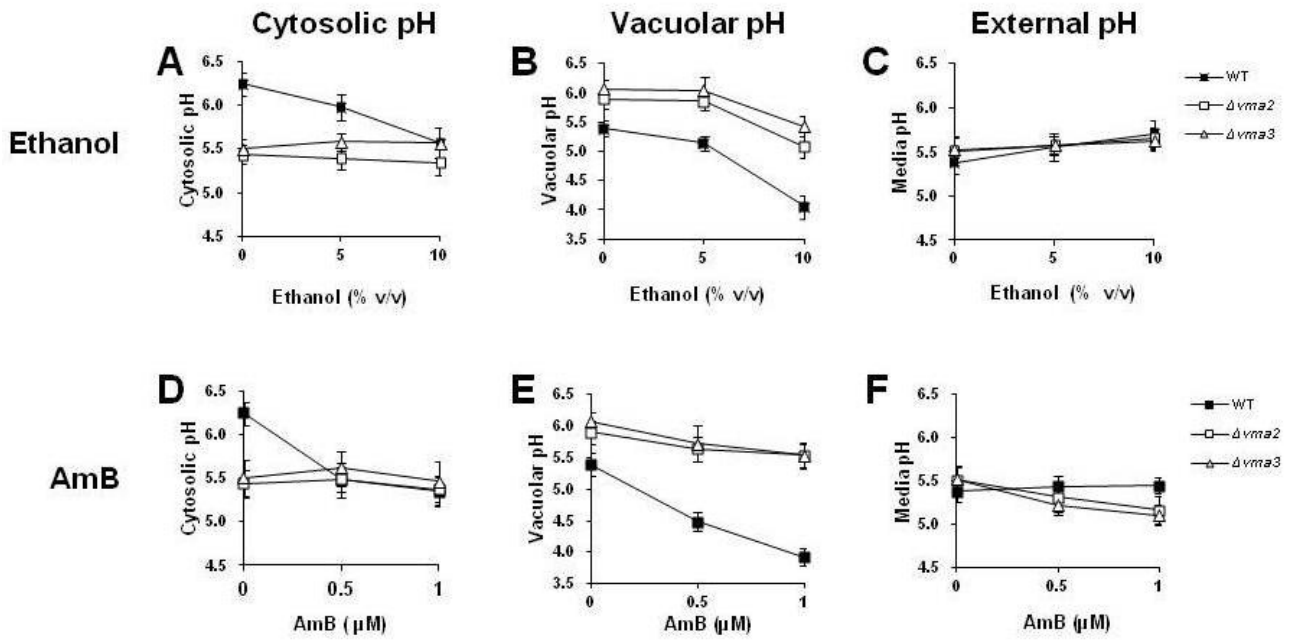

**FIG S3** The effects of long-term exposure to straight-chain alcohols and AmB on cytosolic, vacuolar, and external pH in the mutants lacking V-ATPase. Cytosolic, vacuolar, and external pH of the wild-type (BY 4742) (■),  $\Delta vma2$  (□), and  $\Delta vma3$  (△) cells incubated in YPD media containing 0, 5, and 10% ethanol (A–C) and 0, 0.5, and 1  $\mu$ M AmB (D–F) at 30 °C for 12 h were measured. The log-phase cells transformed with pYES-*P<sub>ACT1</sub>*-pHluorin were used for the measurement of cytosolic pH (A and D), whereas the log-phase cells without the plasmid were used for the measurement of vacuolar pH (B and E) and external pH (C and F). Error bars indicate  $\pm$  S.D.
